# Supplementary material for: NIR Spectrometric Approach for Geographical Origin Identification and Taste Related Compounds Content Prediction of Lushan Yunwu Tea
Source: MDPI journal article supplement (doi:10.3390/foods11192976), 2022-09-23
Supplement: s1 [file s1]

## Supplementary materials

Article

# NIR spectrometric approach for geographical origin identification and taste related compounds content prediction of Lushan Yunwu Tea

Xiaoli Yan<sup>1</sup>, Yujie Xie<sup>1</sup>, Jianhua Chen<sup>2</sup>, Tongji Yuan<sup>1</sup>, Tuo Leng<sup>1</sup>, Yi Chen<sup>1,\*</sup>, Jianhua Xie<sup>1</sup>, Qiang Yua<sup>1</sup>

<sup>1</sup> State Key Laboratory of Food Science and Technology, Nanchang University, Nanchang 330047, China

<sup>2</sup> Agriculture and Rural Bureau Agency of Lianxi District, Jiujiang 332005, China

\* Correspondence: Correspondence: chenyi-417@163.com; Tel./Fax: +86-0791-88304449

**Abstract:** Lushan Yunwu Tea is one of the unique Chinese tea series, and total polyphenols (TP), free amino acids (FAA), and polyphenols-to-amino acids ratio models (TP/FAA) are its important taste related indicators. In this work, a feasibility study was proposed to simultaneously predict the authenticity identification and taste related indicators of Lushan Yunwu tea using near-infrared spectroscopy combined with multivariate analysis. Different waveband selections and spectral pre-processing methods were compared during the discriminant analysis (DA) and partial least square (PLS) models building process. DA model achieved optimal performance in distinguishing Lushan Yunwu tea from other non-Lushan Yunwu tea with a correct classification rate up to 100%. The synergy interval partial least square (siPLS) and backward interval partial least square (biPLS) algorithms showed considerable advantages in improving the prediction performance of TP, FAA, and TP/FAA. The siPLS algorithms achieved the best prediction results for TP (RP = 0.9407, RPD = 3.00), FAA (RP = 0.9110, RPD = 2.21) and TP/FAA (RP = 0.9377, RPD = 2.90). These results indicated that NIR spectroscopy was a useful and low-cost tool to offer definitive quantitative and qualitative analysis for Lushan Yunwu Tea.

**Keywords:** Lushan Yunwu Tea, NIR, authenticity, taste related indicators, prediction

**Table S1.** A summary of tested samples.

| Sample No.                   | Origin                       | Logo      | Harvesting<br>Season | Fixation      | Category |
|------------------------------|------------------------------|-----------|----------------------|---------------|----------|
| L1-L7                        | Bailu, Jiujiang              | Yunwu Tea | Spring               | Stir fixation | LY       |
| L8                           | Donggushan, Jiujiang         | Yunwu Tea | Spring               | Stir fixation | LY       |
| L9-L18                       | Gaolong, Jiujiang            | Yunwu Tea | Spring               | Stir fixation | LY       |
| L19-L20, L22-L23,<br>L46-L47 | Lushan Mountain,<br>Jiujiang | Yunwu Tea | Spring               | Stir fixation | LY       |
| L21                          | Lianhua, Jiujiang            | Yunwu Tea | Spring               | Stir fixation | LY       |
| L24-L26                      | Minshan, Jiujiang            | Yunwu Tea | Spring               | Stir fixation | LY       |
| L27-L34                      | Saiyang, Jiujiang            | Yunwu Tea | Spring               | Stir fixation | LY       |
| L35-L39                      | Tongyuan, Jiujiang           | Yunwu Tea | Spring               | Stir fixation | LY       |
| L40-L45                      | Weijia, Jiujiang             | Yunwu Tea | Spring               | Stir fixation | LY       |
| L48-L50                      | Chaisang, Jiujiang           | Yunwu Tea | Spring               | Stir fixation | LY       |
| L51-L56                      | Yujiahe, Jiujiang            | Yunwu Tea | Spring               | Stir fixation | LY       |
| F1-F10                       | Fujian                       | Yunwu Tea | Spring               | Stir fixation | NLY      |
| G1-G10                       | Guangxi                      | Yunwu Tea | Spring               | Stir fixation | NLY      |
| S1-S10                       | Sichuan                      | Yunwu Tea | Spring               | Stir fixation | NLY      |

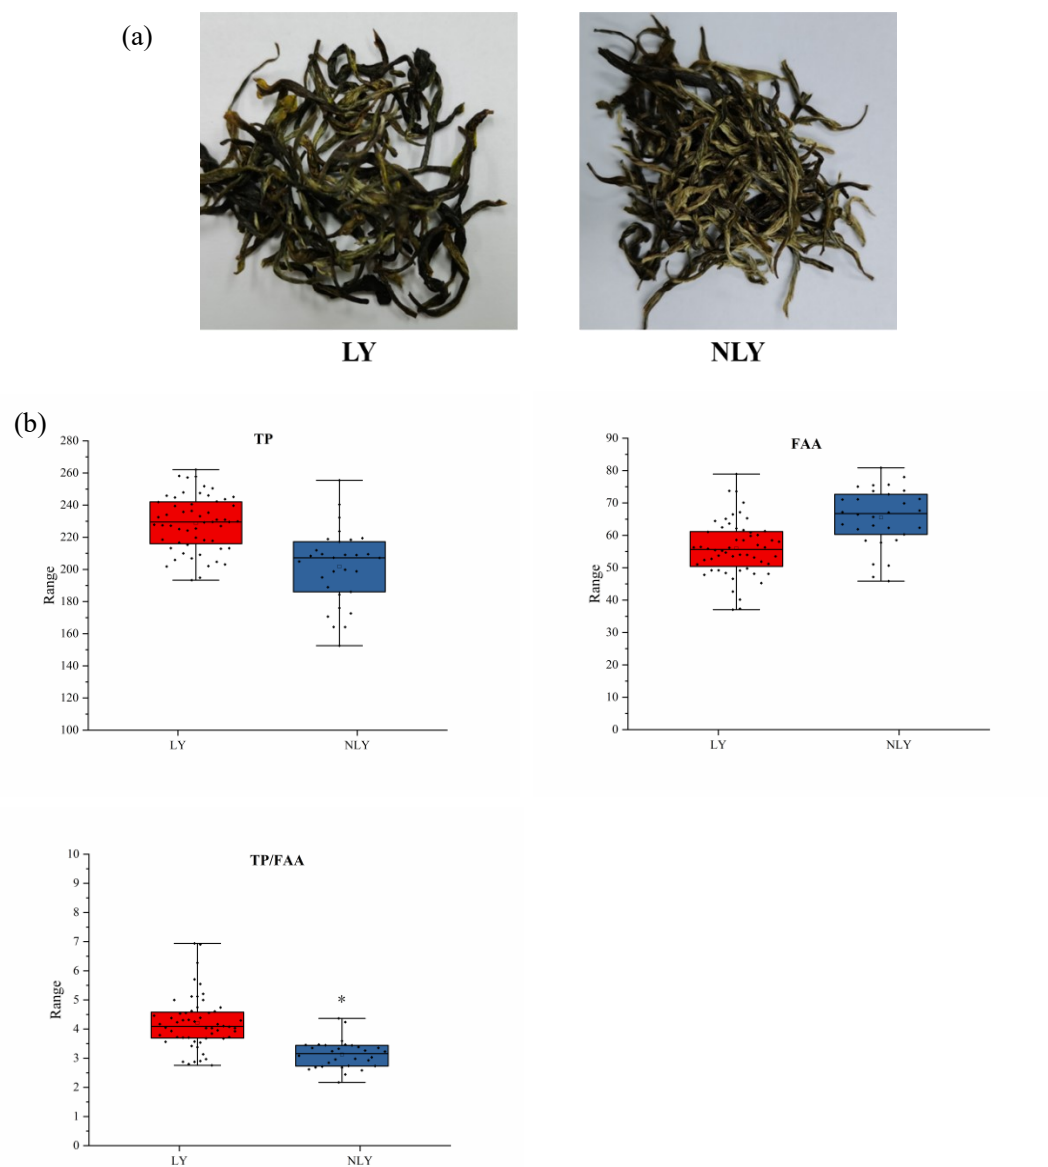

**Figure S1.** (a) The representative images of LY and NLY samples; (b) boxplots of TP, FAA and TP/FAA contents in the LY and NLY samples. Note: “\*” indicated a significant difference between the two groups ( $p < 0.05$ ).

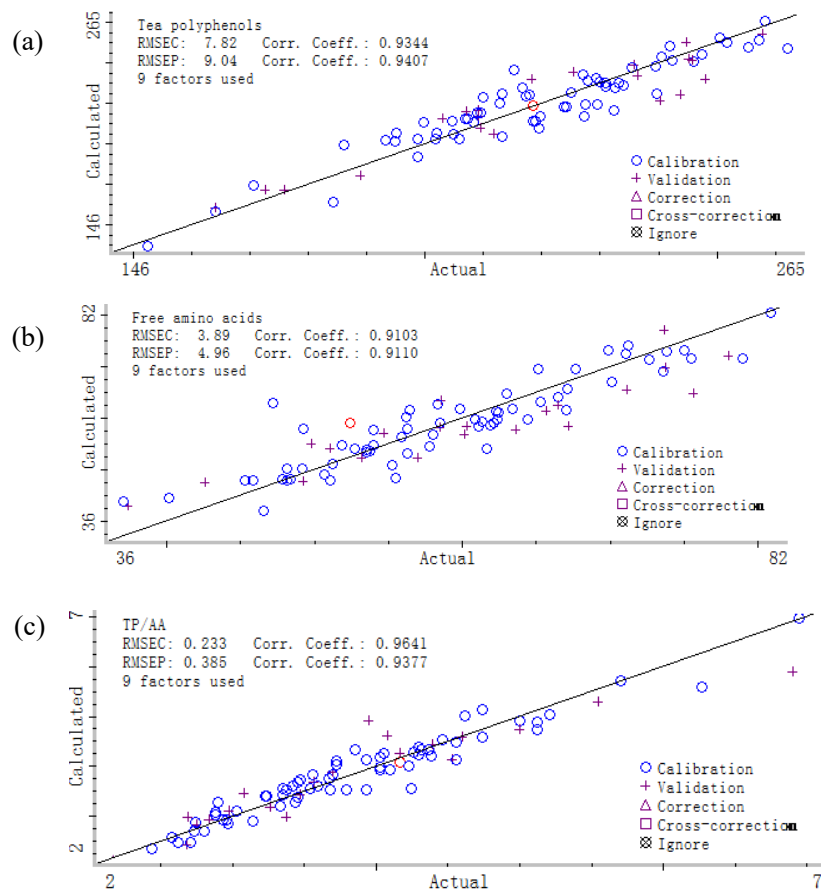

**Figure S2.** Correlation between the measured and predicted values of siPLS models. (a) TP; (b) FAA; (c) TP/FAA.

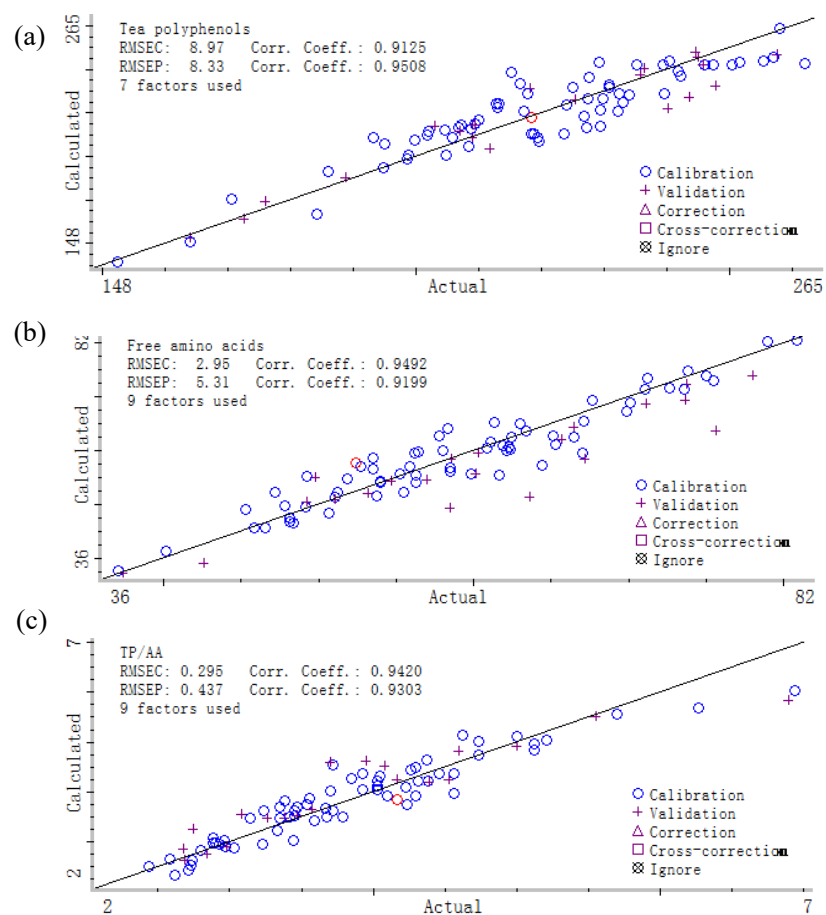

**Figure S3.** Correlation between the measured and predicted values of biPLS models. (a) TP; (b) FAA; (c) TP/FAA.
